# Supplementary material for: Insights into the Fold Organization of TIM Barrel from Interaction Energy Based Structure Networks
Source: PubMed Central journal article supplement (PMC3355060; doi:10.1371/journal.pcbi.1002505), 2012-05-17
Supplement: pcbi.1002505.s002.pdf [file pcbi.1002505.s002.pdf]

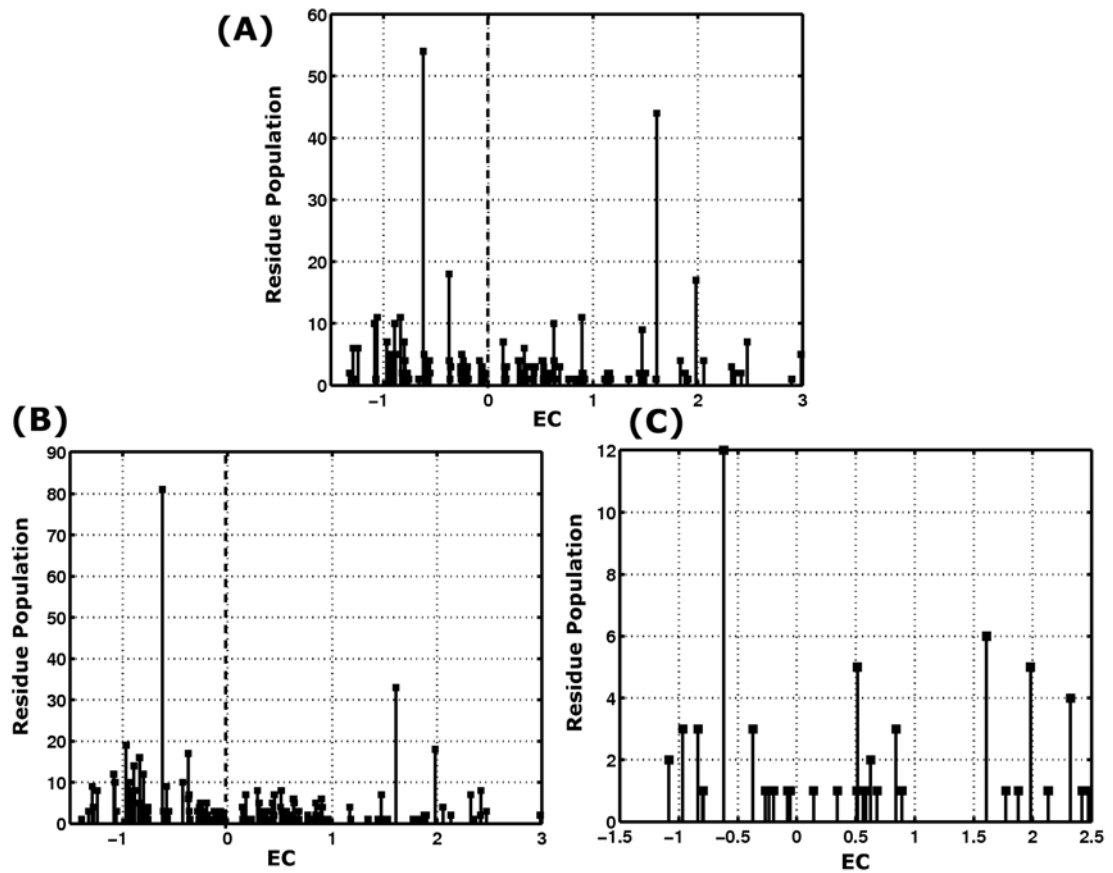

**Figure S2 Conserved  $\alpha/\beta$  and  $\alpha/\alpha$  interactions in different families of the TIM fold.**

(A) The bar diagram shows the EC of the residues involved in conserved interactions present at the  $\alpha/\beta$  interface in different families of the TIM barrel fold. The distribution of the EC scores for the residues involved in conserved  $\alpha/\alpha$  interactions in the  $f\text{-PEN}_{4(0.8)}$  (B) and  $f\text{-PEN}_{10(0.8)}$  (C) for different families of the TIM fold are shown. The residues seem to be non-conserved across the members of the families.
