# Supplementary material for: Insights into the Fold Organization of TIM Barrel from Interaction Energy Based Structure Networks
Source: PubMed Central journal article supplement (PMC3355060; doi:10.1371/journal.pcbi.1002505), 2012-05-17
Supplement: pcbi.1002505.s003.pdf [file pcbi.1002505.s003.pdf]

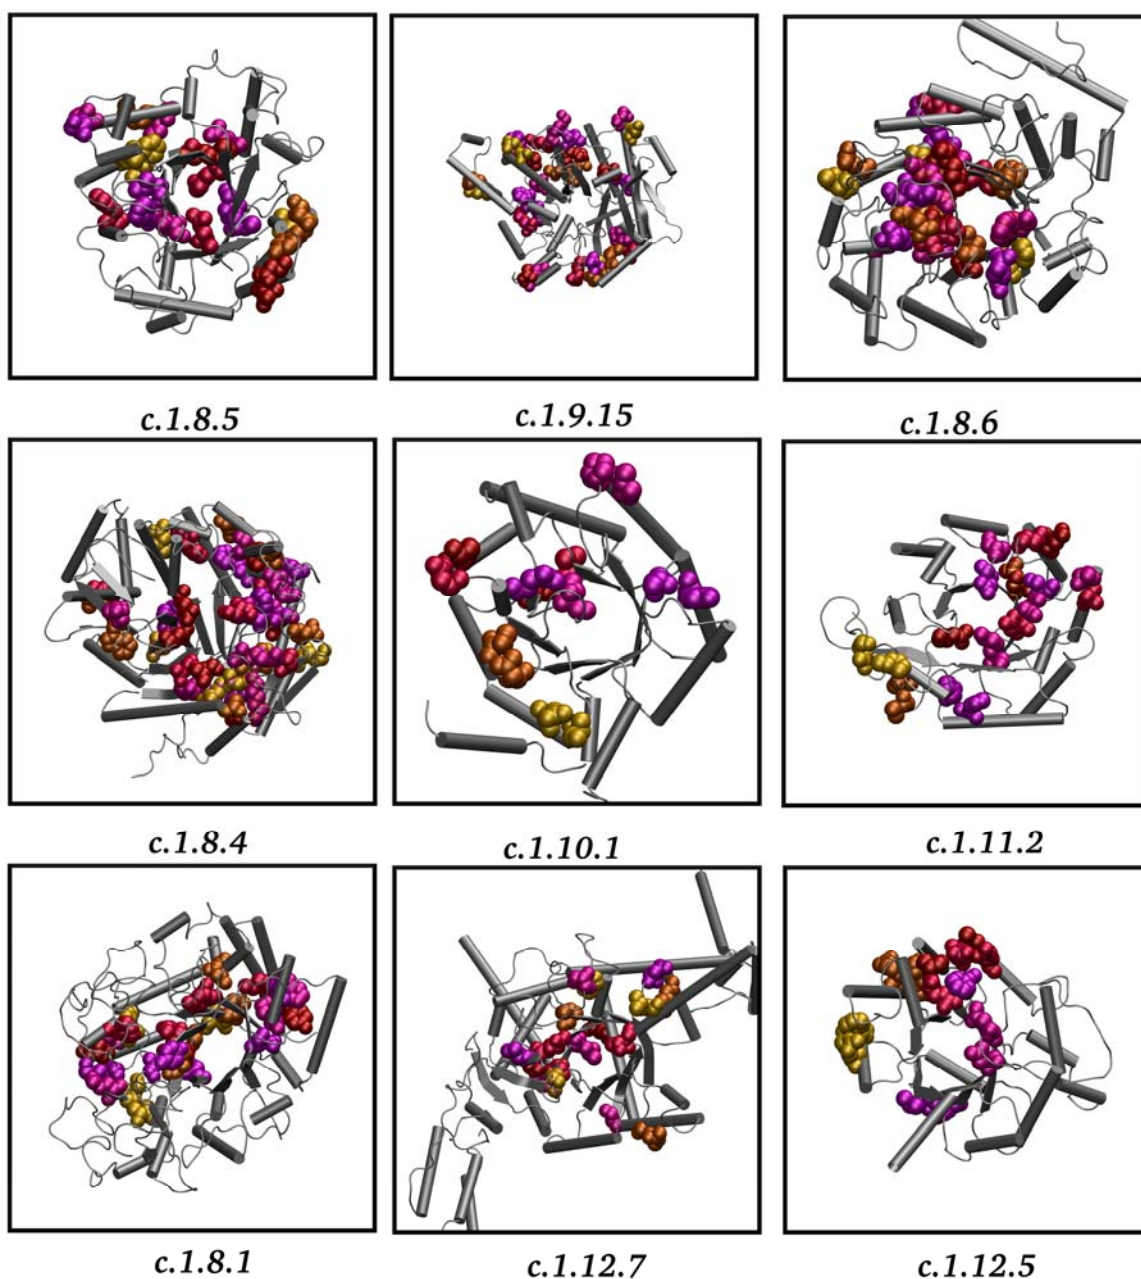

**Figure S3 - Presence of conserved high energy interactions at the catalytic face of the TIM fold**

The residues participating in the conserved interactions ( $f$ -PEN<sub>-20(0.8)</sub>) at the loop regions of different families of the TIM fold are highlighted in various shades of red.
