# Supplementary material for: Insights into the Fold Organization of TIM Barrel from Interaction Energy Based Structure Networks
Source: PubMed Central journal article supplement (PMC3355060; doi:10.1371/journal.pcbi.1002505), 2012-05-17
Supplement: pcbi.1002505.s005.pdf [file pcbi.1002505.s005.pdf]

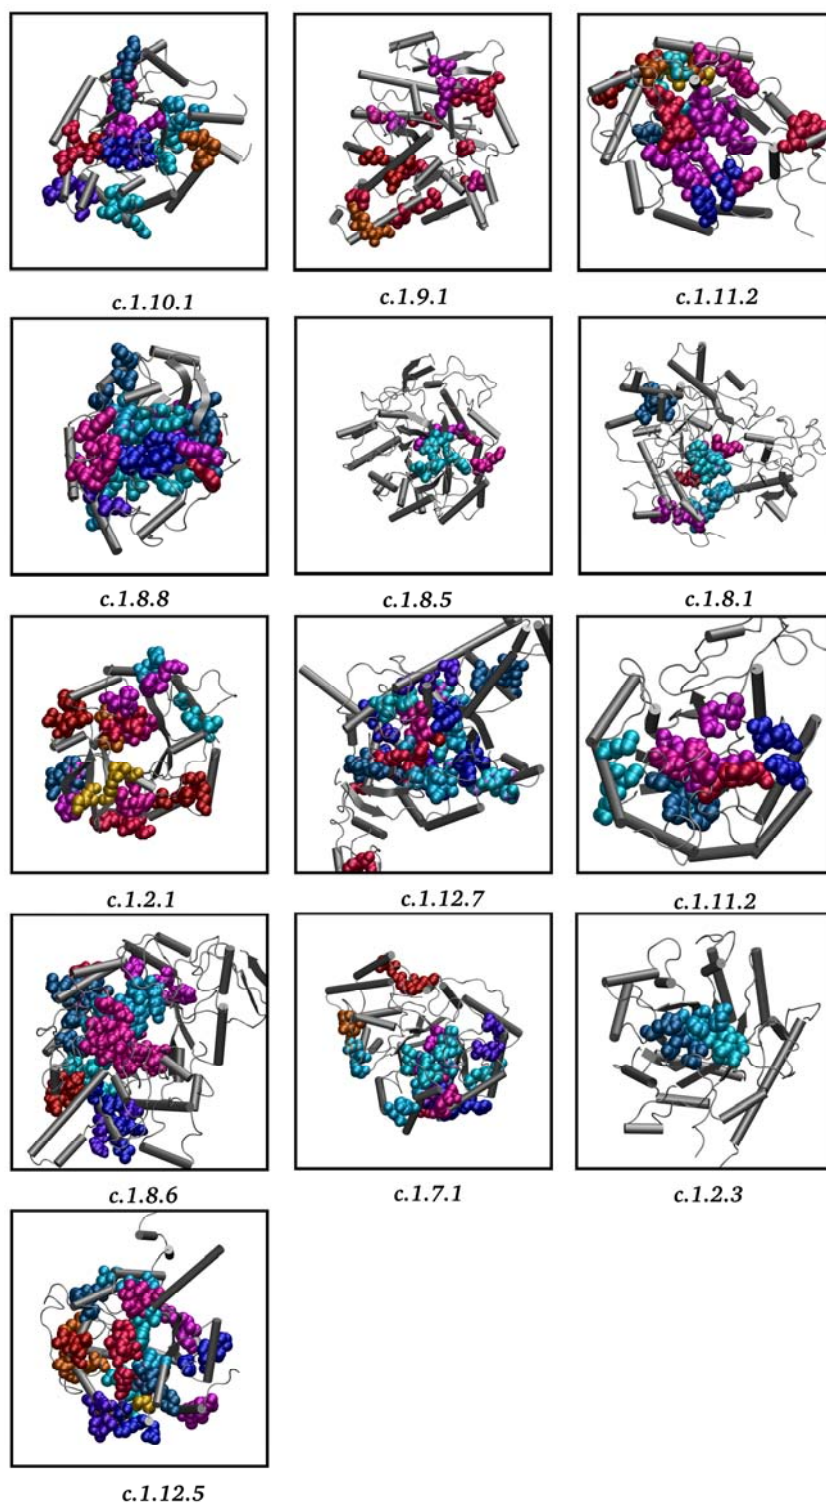

**Figure S5 - Family specific clusters from the *f*-PENs for selected families of the TIM fold.**

Clusters obtained from *f*-PENs are highlighted as spheres in different families of the TIM fold. High energy clusters involving charged interactions at the core of the core  $\beta$  barrel residues that are obtained from the *f*-PENs-25(0.8) are distinguished by different shades of red. Low energy vdW clusters that are obtained from *f*-ljPEN-8(1.0) are highlighted in different shades of blue in different families of the TIM fold.
