# Supplementary material for: Insights into the Fold Organization of TIM Barrel from Interaction Energy Based Structure Networks
Source: PubMed Central journal article supplement (PMC3355060; doi:10.1371/journal.pcbi.1002505), 2012-05-17
Supplement: pcbi.1002505.s006.pdf [file pcbi.1002505.s006.pdf]

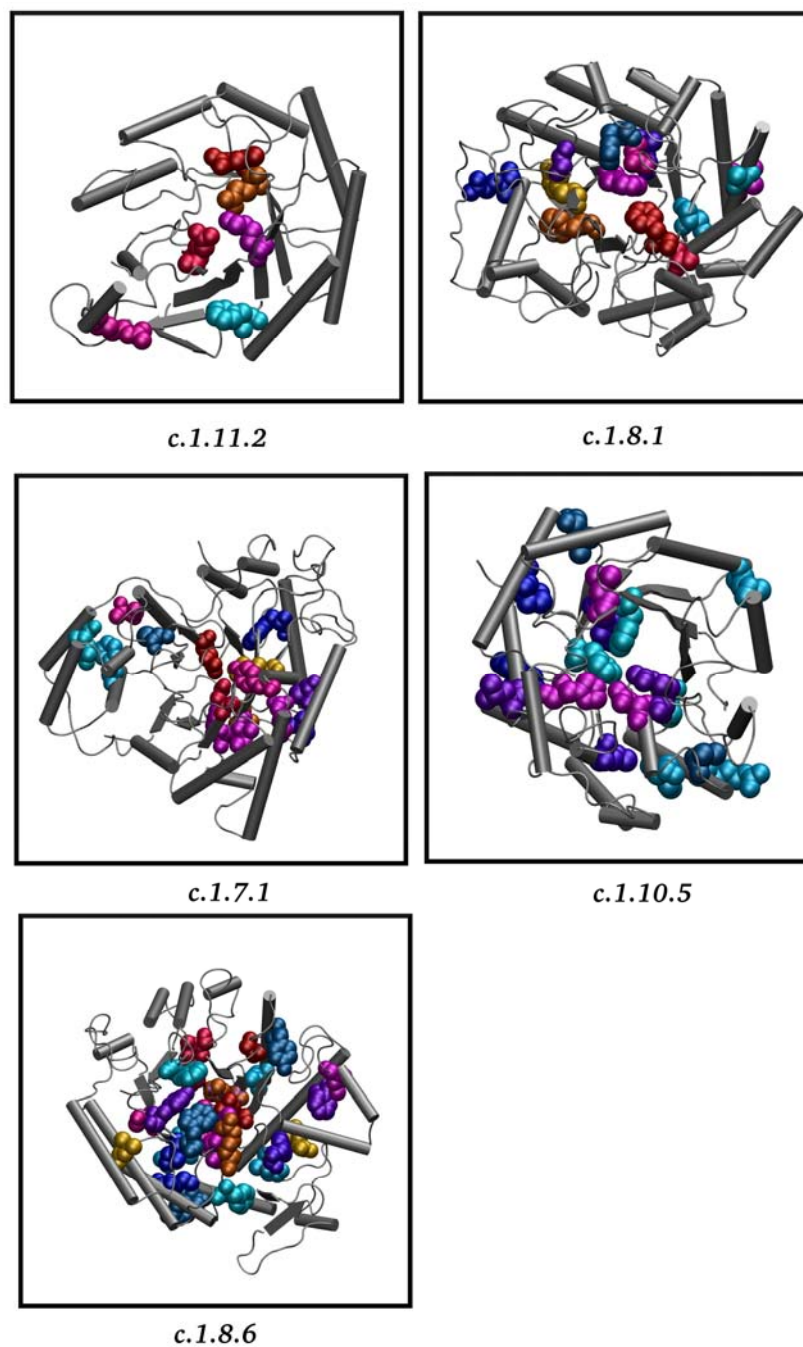

**Figure S6 - Conserved hubs present in some of the families of the TIM Barrel.**

The above figure shows the conserved hubs present in D-glucarate dehydratase-like (c.1.11.2, DGDL), Amylase (c.1.8.1, ACD), Aldo-keto reductases (c.1.7.1, AKR), HMGL-like (c.1.10.5, HMGL) and beta-N-acetylhexosaminidase (c.1.8.1, BNAH) families of the TIM Barrel domain. The hubs that are in shades of blue are from *f*-PEN-15(0.7) and that highlighted in shades of red are from *f*-PEN-7(1.0).
