# Supplementary material for: Insights into the Fold Organization of TIM Barrel from Interaction Energy Based Structure Networks
Source: PubMed Central journal article supplement (PMC3355060; doi:10.1371/journal.pcbi.1002505), 2012-05-17
Supplement: pcbi.1002505.s009.pdf [file pcbi.1002505.s009.pdf]

**Table S2 Dataset taken for SCA calculation**

| <b>Protein Name</b>         | <b>Number of Sequences Considered</b> | <b>Ligand location</b> |
|-----------------------------|---------------------------------------|------------------------|
| Xylanase                    | 52                                    | C-term                 |
| Endoglucanase CelA          | 23                                    | -                      |
| Endoglucanase CelC          | 2                                     | C-term                 |
| Beta-mannanase              | 11                                    | -                      |
| Mannanase A                 | 23                                    | C-term                 |
| Plant beta-glucanases       | 2                                     | -                      |
| beta-Galactosidase          | 34                                    | C-term                 |
| beta-Glucuronidase          | 4                                     | C-term                 |
| Xylanase A                  | 49                                    | C-term                 |
| Glucosylceramidase          | 4                                     | C-term                 |
| Alpha-L-arabinofuranosidase | 7                                     | -                      |
| Beta-D-xylosidase           | 2                                     | -                      |
| endo-1,4-beta-mannosidase   | 7                                     | -                      |
| Endoglucanase H             | 102                                   | C-term                 |

*All the protein sequences belonging to the  $\beta$ -glycanase family (according to SCOP) was culled for sequences with at least less than 50% sequence identity and length between 200 and 500 residues. This yields 324 sequences from 15 proteins. The Multiple Sequence Alignment (MSA) was done using ClustalW. Alignment positions with less than 20% gaps we considered for SCA calculation. Default SCA parameters are used and the pairwise positional correlation varies from 0.2 – 0.6 majorly. The SCA code was obtained from Rama Ranganathan's Lab through personal communication. All the SCA results are mapped back to the structure of 1EDG for ease of structural mapping and comparison with structure based analyses (Figure 7).*
