# Supplementary material for: Insights into the Fold Organization of TIM Barrel from Interaction Energy Based Structure Networks
Source: PubMed Central journal article supplement (PMC3355060; doi:10.1371/journal.pcbi.1002505), 2012-05-17
Supplement: pcbi.1002505.s010.pdf [file pcbi.1002505.s010.pdf]

**Table S3: Comparison of the “cluster residues” from *f*-PEN and the “sector residues” from SCA in  $\beta$ -glycanase family**

| Cluster residues ( <i>f</i> -PEN)*                  | Sector residues (SCA)*   | Common residues (sectors $\cap$ clusters)* |
|-----------------------------------------------------|--------------------------|--------------------------------------------|
| 72, 69, 65, 77, 117, 163, 118, 218, 164, 119, 248,  | 55, 73, 74, 81, 82, 83,  | 163                                        |
| 219, 165, 120, 166, 167, 220, 250, 302, 335, 303,   | 104, 106, 109, 110, 112, | 164                                        |
| 251, 304, 253, 337, 306, 338, 305, 336, 32, 170,    | 114, 119, 123, 130, 158, | 119                                        |
| 254, 307, 255, 308, 339, 34, 35, 169, 79, 33, 78,   | 159, 160, 161, 163, 164, | 219                                        |
| 116, 76, 115, 110, 106, 103, 107, 104, 111, 112,    | 165, 167, 169, 171, 199, | 165                                        |
| 108, 105, 109, 113, 71, 68, 64, 67, 63, 66, 73, 70, | 203, 206, 207, 219, 226, | 167                                        |
| 75, 31, 141, 147, 146, 150, 148, 144, 142, 139,     | 228, 229, 230, 231, 237, | 302                                        |
| 145, 143, 140, 137, 197, 210, 207, 201, 204, 208,   | 252, 255, 270, 272, 273, | 255                                        |
| 209, 205, 199, 202, 206, 203, 200, 198, 196, 320,   | 277, 288, 290, 293, 300, | 169                                        |
| 329, 330, 326, 323, 324, 327, 328, 325, 322, 319    | 302, 318, 319, 321, 323, | 110                                        |
|                                                     | 328                      | 106                                        |
|                                                     |                          | 104                                        |
|                                                     |                          | 112                                        |
|                                                     |                          | 109                                        |
|                                                     |                          | 73                                         |
|                                                     |                          | 207                                        |
|                                                     |                          | 199                                        |
|                                                     |                          | 206                                        |
|                                                     |                          | 203                                        |
|                                                     |                          | 323                                        |

\* Residue numbers corresponding to PDB id 1EDG are given.
