# Supplementary material for: Insights into the Fold Organization of TIM Barrel from Interaction Energy Based Structure Networks
Source: PLoS Comput Biol. 2012 May 17;8(5):e1002505. doi: 10.1371/journal.pcbi.1002505 (PMC3355060; doi:10.1371/journal.pcbi.1002505)
Supplement: Table S1 — Different families of the TIM fold taken for analysis. (PDF) [file pcbi.1002505.s008.pdf]

**Table S1 Dataset of TIM fold**

| S No | SCOP ID  | Family Name                                      | Abbreviations used | Total members |
|------|----------|--------------------------------------------------|--------------------|---------------|
| 1    | c.1.8.4  | Family 1 of glycosyl hydrolase                   | F1GH               | 5             |
| 2    | c.1.8.6  | beta-N-acetylhexosaminidase catalytic domain     | BNAH               | 4             |
| 3    | c.1.8.3  | beta-glycanases                                  | BG                 | 11            |
| 4    | c.1.10.1 | Class I aldolase                                 | C1A                | 3             |
| 5    | c.1.9.15 | PP1699/LP2961-like                               | PPL                | 3             |
| 6    | c.1.2.1  | Histidine biosynthesis enzymes                   | HB                 | 3             |
| 7    | c.1.8.1  | Amylase, catalytic domain                        | ACD                | 6             |
| 8    | c.1.10.5 | HMGL-like                                        | HMGL               | 2             |
| 9    | c.1.9.1  | Adenosine/AMP deaminase                          | ADA                | 2             |
| 10   | c.1.11.2 | D-glucarate dehydratase-like                     | DGDL               | 6             |
| 11   | c.1.2.4  | Tryptophan biosynthesis enzymes                  | WB                 | 3             |
| 12   | c.1.4.1  | FMN-linked oxidoreductases                       | FMNO               | 6             |
| 13   | c.1.6.1  | Alanine racemase-like, N-terminal domain         | ARLN               | 3             |
| 14   | c.1.2.3  | Decarboxylase                                    | DC                 | 5             |
| 15   | c.1.12.5 | HpcH/HpaI aldolase                               | HPXA               | 3             |
| 16   | c.1.8.8  | 1,4-beta-N-acetylmuraminidase                    | BNAM               | 3             |
| 17   | c.1.7.1  | Aldo-keto reductases (NADP)                      | AKR                | 4             |
| 18   | c.1.12.7 | Phosphoenolpyruvate mutase/Isocitrate lyase-like | PEPM               | 3             |
| 19   | c.1.8.5  | Type II chitinase                                | T2C                | 4             |

*The families are aligned such that the top families have electrostatically dominated clusters in the central  $\beta$ -barrel. As one proceeds down the order the dominance of the electrostatics decrease and the dominance of vdW clusters increase.*
